# Supplementary material
Source: Springer Nature journal article supplement (https://www.springermedizin.de/resource/supplementary/13024_2013_508_MOESM10_ESM.pdf/9644094)

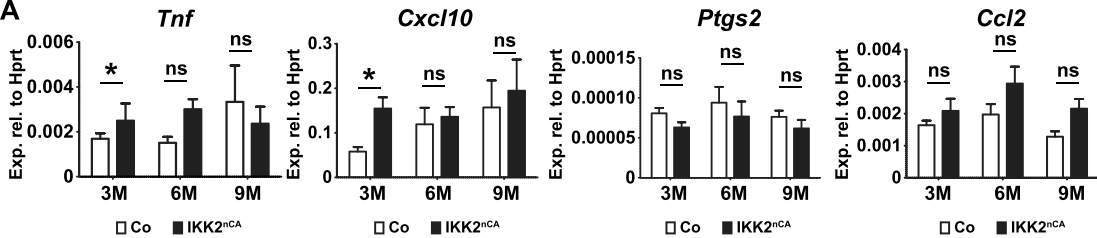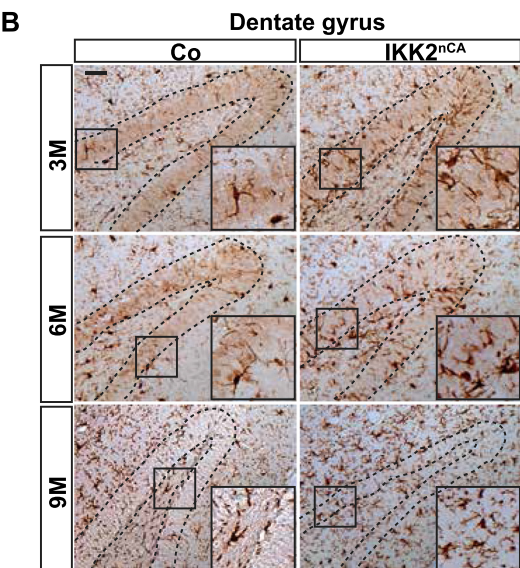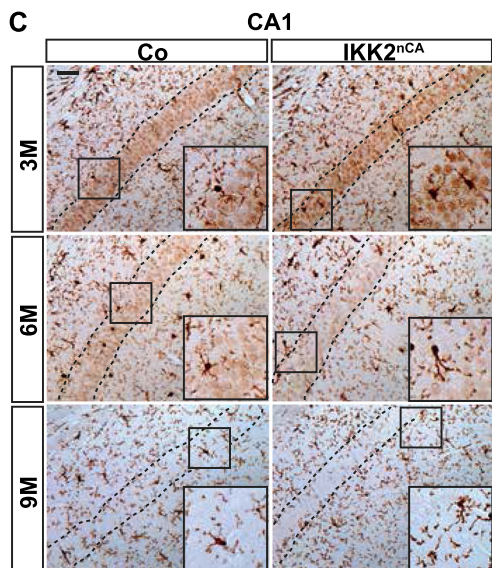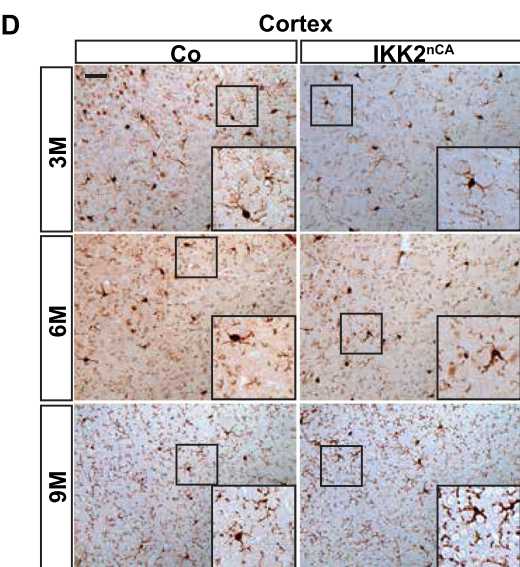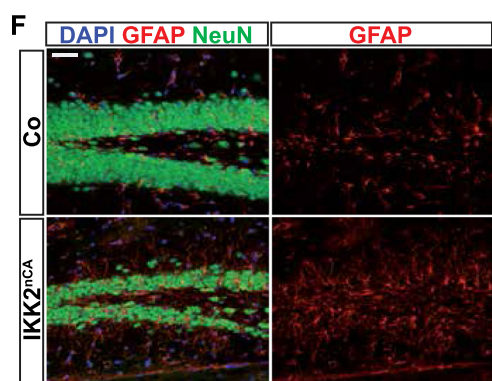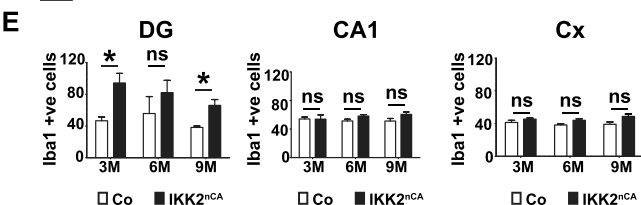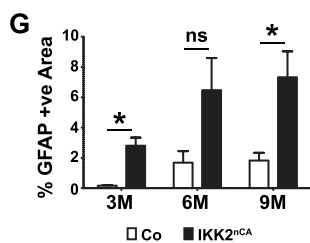

Supplement: MOESM10 [file 9644094]
